# Supplementary material for: Synthesis of Metal-Loaded Carboxylated Biopolymers with Antibacterial Activity through Metal Subnanoparticle Incorporation
Source: MDPI journal article supplement (doi:10.3390/antibiotics11040439), 2022-03-24
Supplement: s1 [file s1]

# Synthesis of metal-loaded carboxylated biopolymers with anti-bacterial activity through metal subnanoparticle incorporation

Farzaneh Noori et al...Abdelkrim Azzouz

## SUPPORTING INFORMATION

### Biopolymer structure

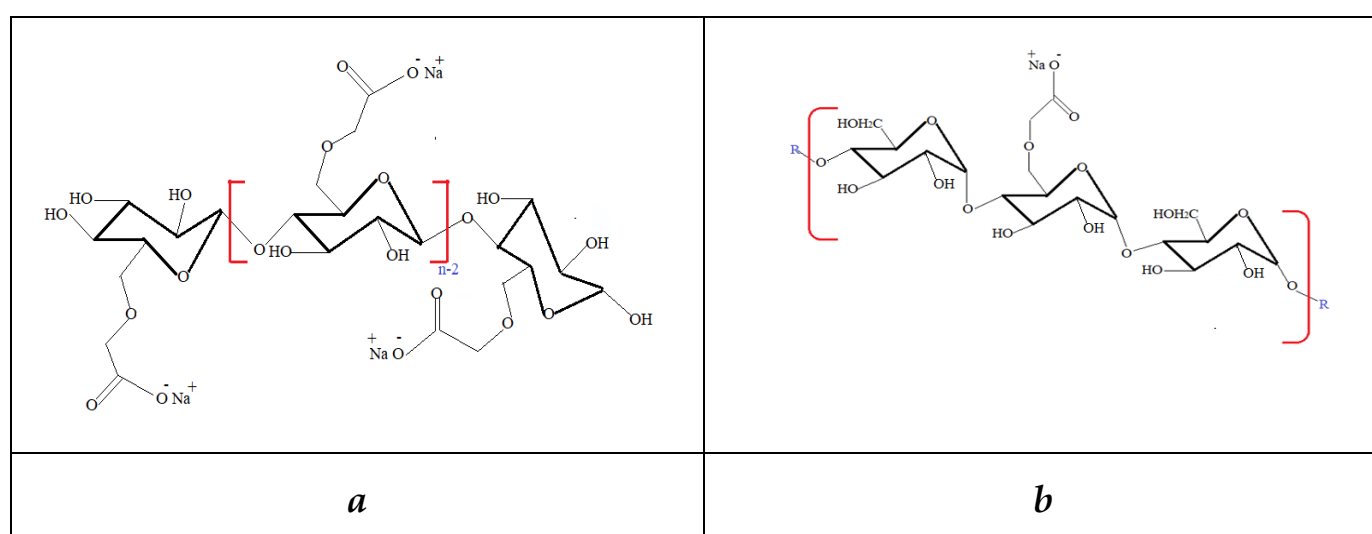

**Figure S1.** Chemical structure of sodium carboxymethyl cellulose (CMC) (a) and sodium carboxymethyl starch (CMS) (b).

### Physico-chemical features of some metal cations

**Table S1.** Polarizing power (PP), ionic radius and Zeta potential of different metal cation loaded biopolymers

| Cations          | Polarizing power* | Ionic radius/pm | ZP (mV) |        |
|------------------|-------------------|-----------------|---------|--------|
|                  |                   |                 | CMC     | CMS    |
| Ni <sup>2+</sup> | 2.80              | 70.             | -10.05  | -11.34 |
| Cu <sup>2+</sup> | 2.73              | 73              | -13.82  | -13.28 |
| Zn <sup>2+</sup> | 2.70              | 74.5            | -20.90  | -13.28 |
| Co <sup>2+</sup> | 2.68              | 74              | -23.10  | -13.42 |
| Pt <sup>2+</sup> | 2.50              | 80              | -23.86  | -15.98 |
| Ti <sup>2+</sup> | 2.30              | 86              | -24.40  | -16.42 |
| Ag <sup>+</sup>  | 0.86              | 115             | -30.39  | -17.90 |
| Au <sup>+</sup>  | 0.72              | 137             | -33.53  | -21.81 |

The polarizing power is a cation capacity to polarize the counter anion, i.e. the capacity to attract the electron cloud anion. This factor increases with increasing charge and decreasing size of the cation.

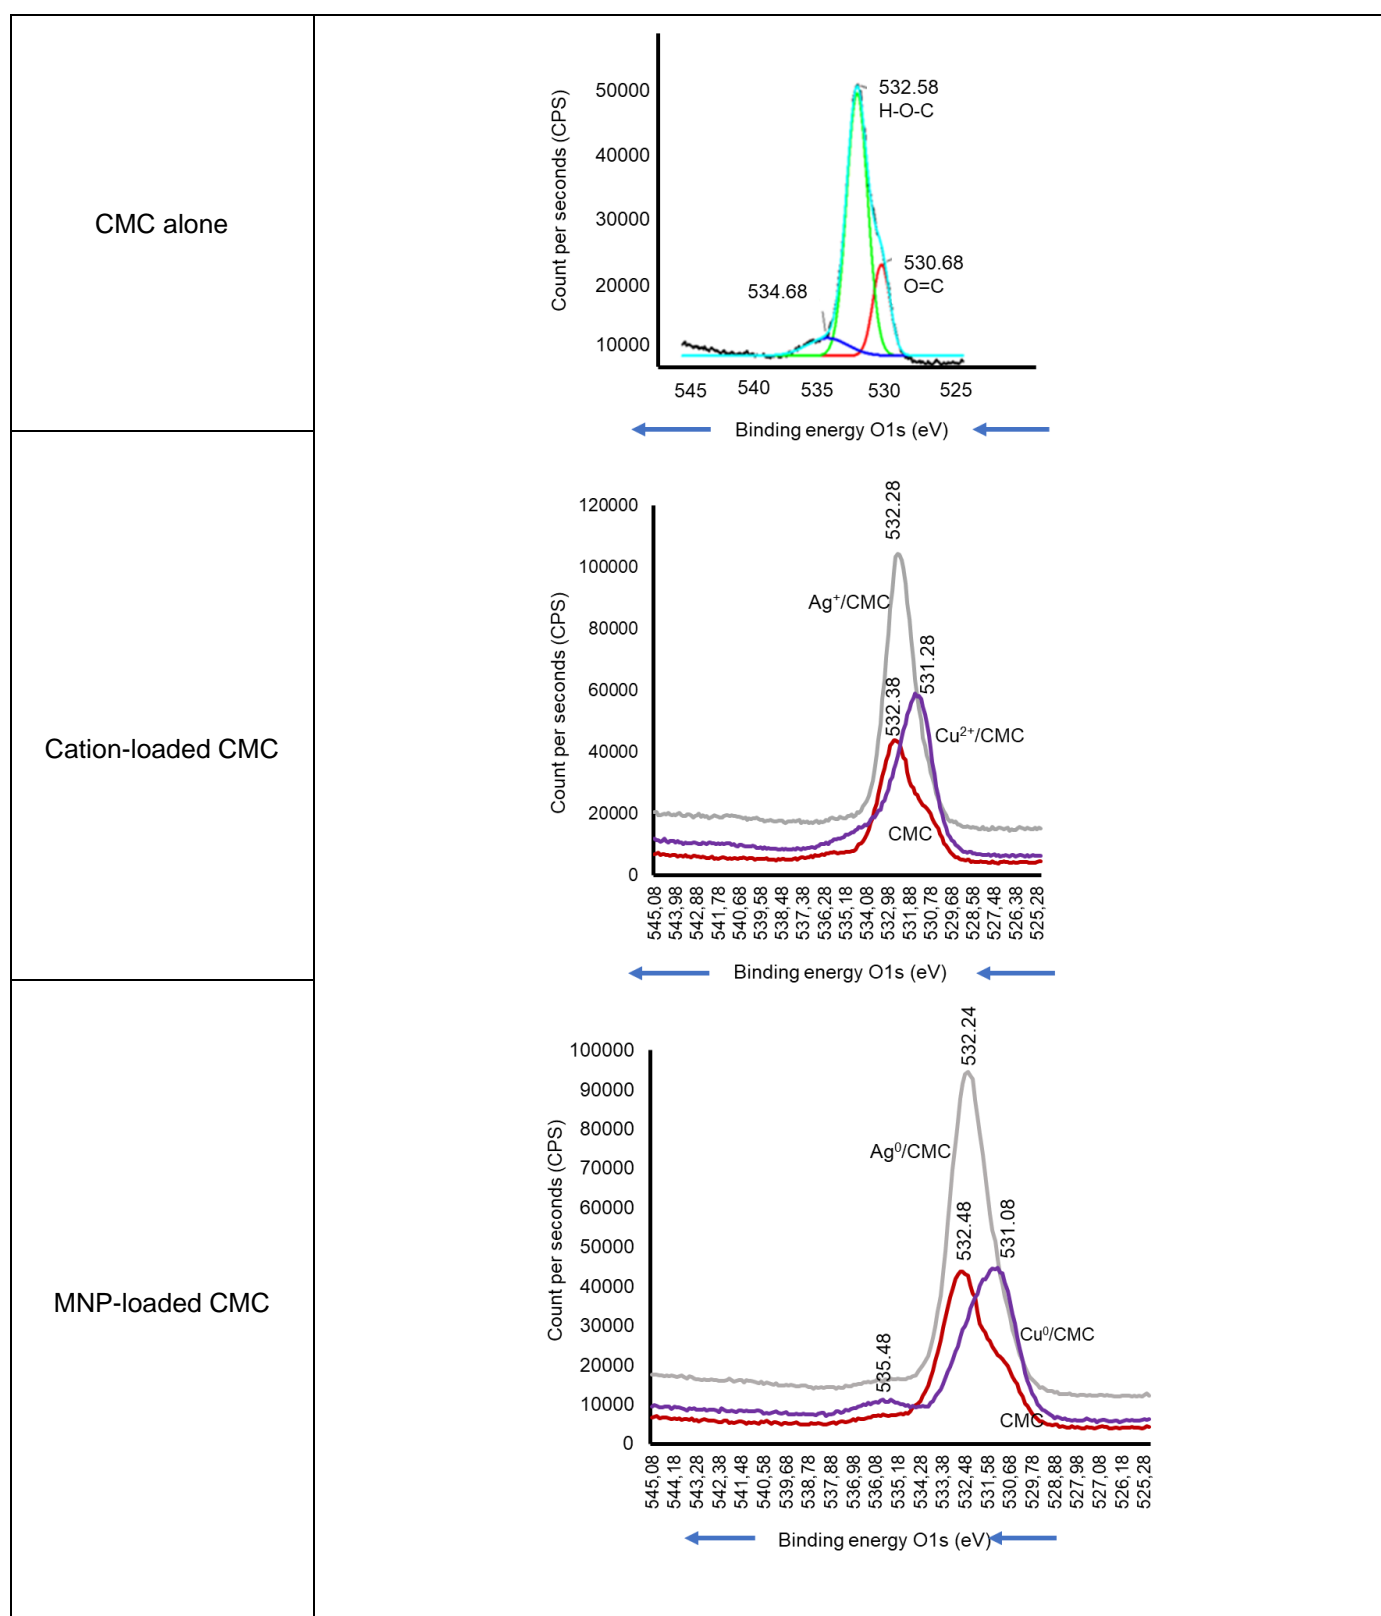

**Figure S2.** O1s XPS spectra of CMC-based samples. The XPS spectra of the starting biopolymers are illustrated by red profiles. \* The binding energy was assessed with absolute error below 0.05 eV.

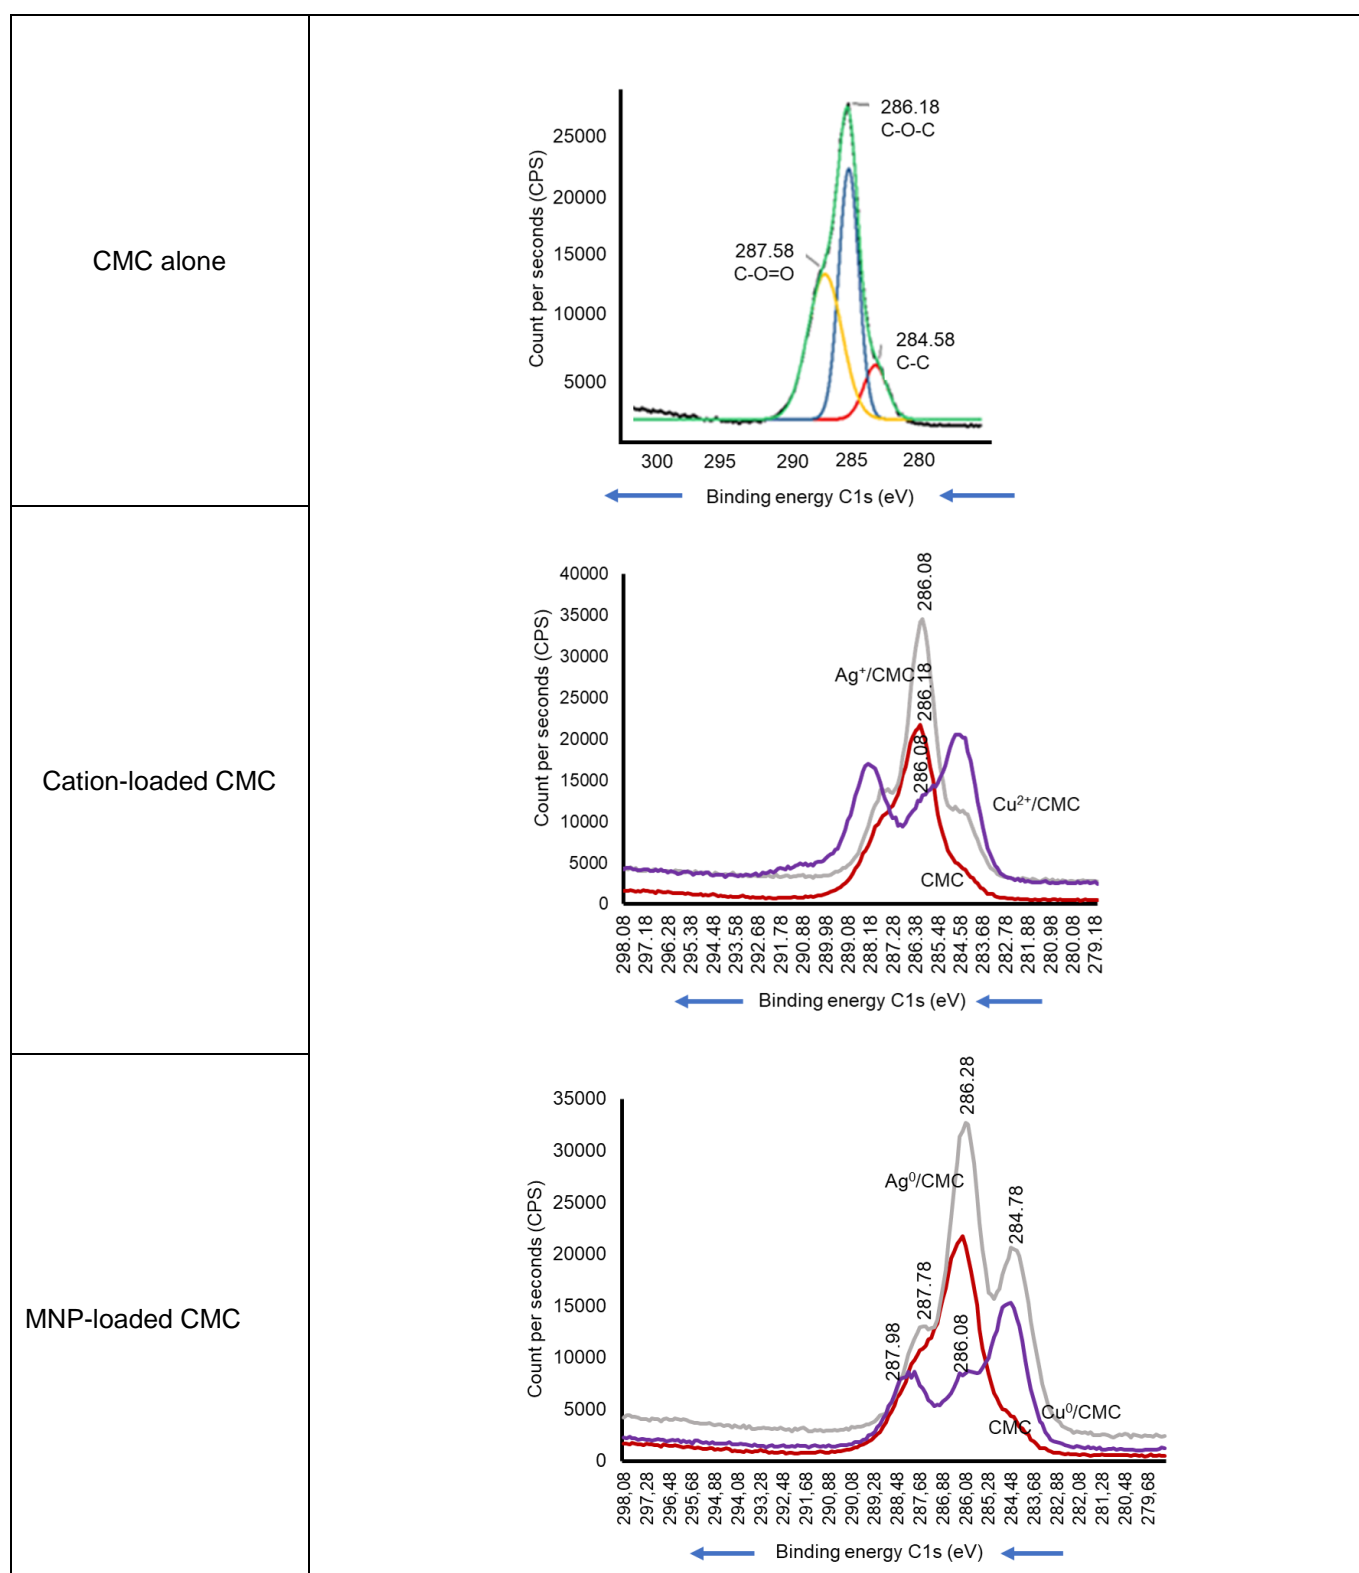

**Figure S3. (A)** C1s XPS spectra of CMC-based samples.

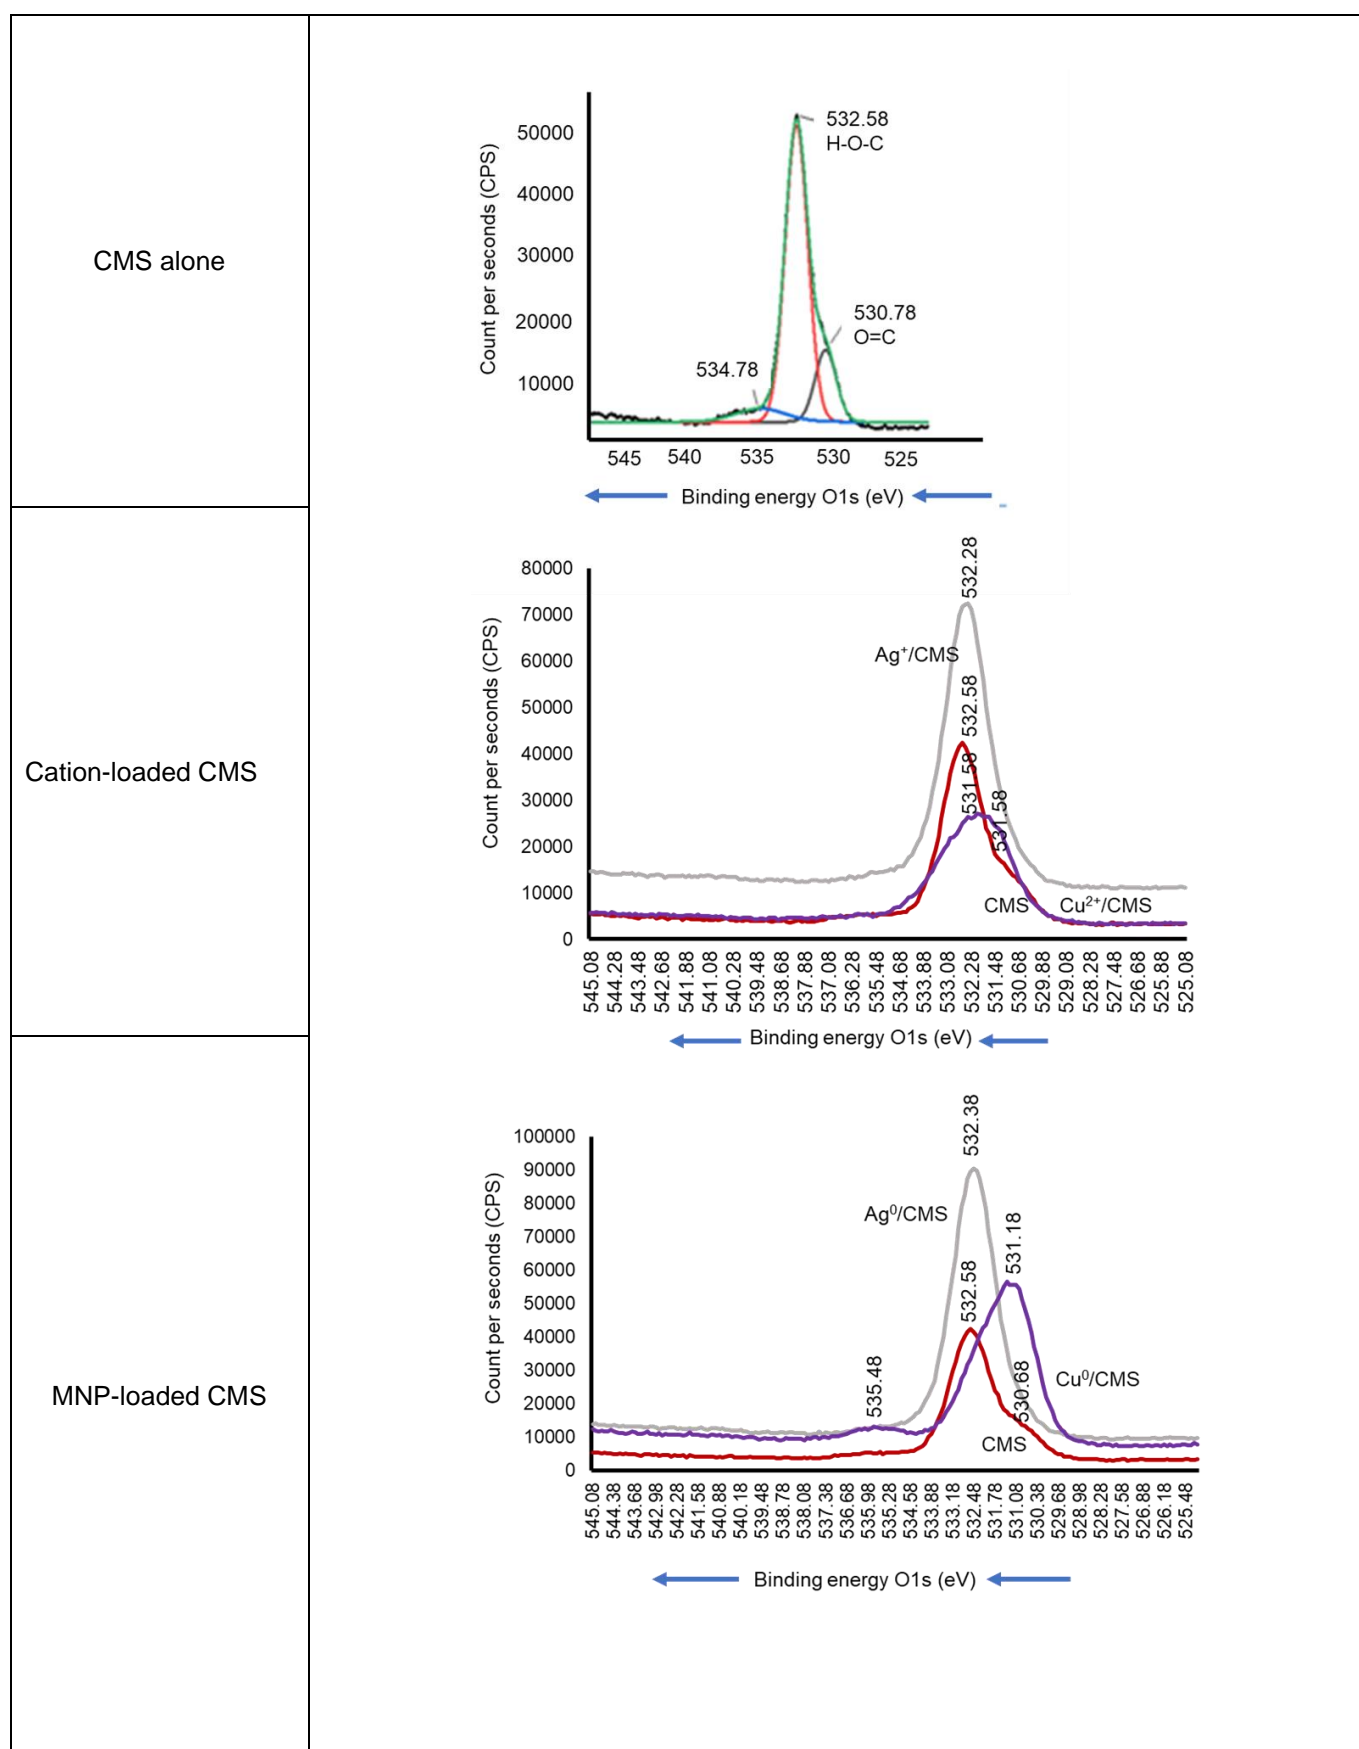

**Figure S3. (B)** O1s XPS spectra of CMS-based samples.

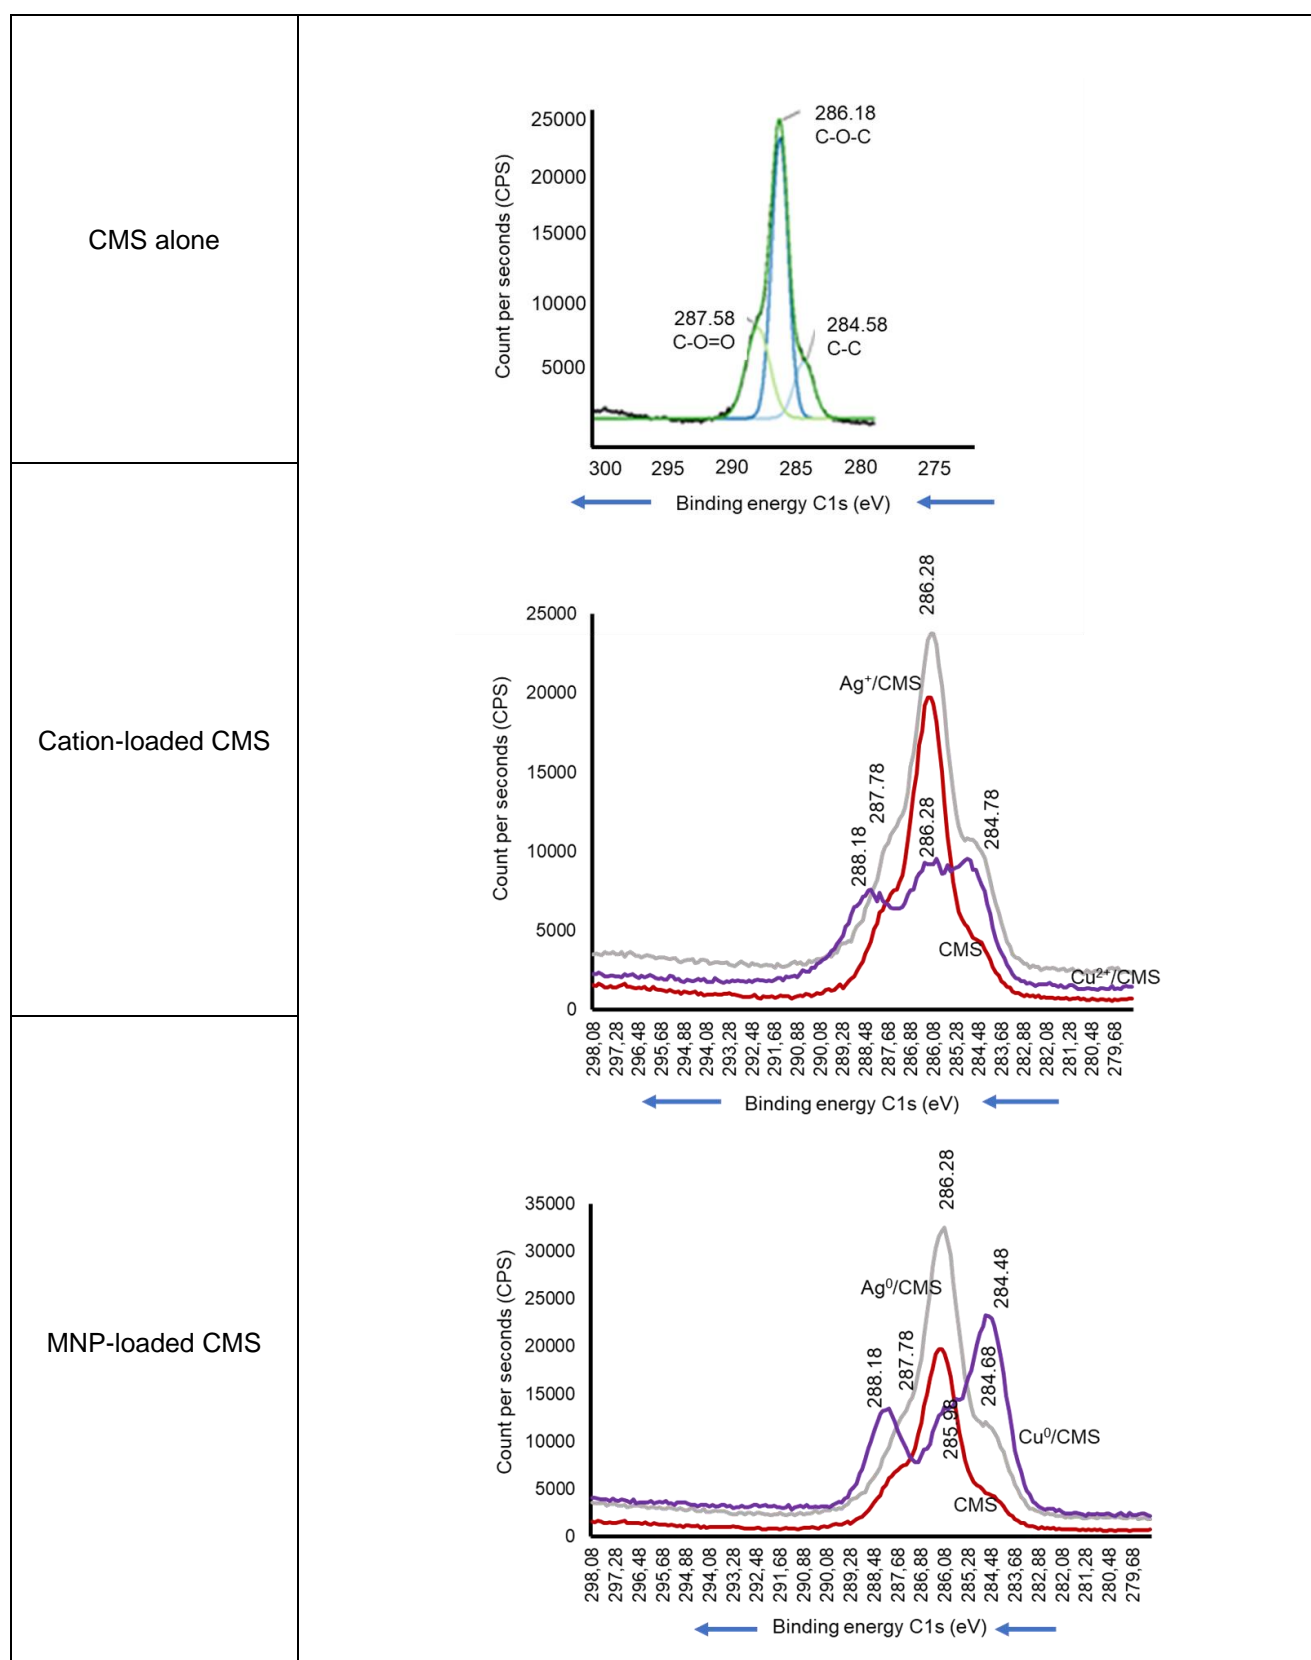

**Figure S3.** (C) C1s XPS spectra of CMS-based samples.

**Figure S3.** (A) C1s XPS spectra of CMC-based samples; (B) O1s XPS spectra of CMS-based samples; (C) C1s XPS spectra of CMS-based samples. The XPS spectra of the starting biopolymers are illustrated by red profiles. \* The binding energy was assessed with absolute error below 0.05 eV.

## XPS BE shift of the key atoms of the biopolymers

**Table S2.** XPS BE shift in CMC-based samples.

| XPS signal      | Binding energy (eV) of CMC- Based samples ( $\pm 0.05$ eV) |        |                    |             |                  |             |                  |             |                  |             |
|-----------------|------------------------------------------------------------|--------|--------------------|-------------|------------------|-------------|------------------|-------------|------------------|-------------|
|                 | Matrix                                                     | Alone  | + Cu <sup>2+</sup> | Shift* (eV) | +Cu <sup>0</sup> | Shift* (eV) | +Ag <sup>+</sup> | Shift* (eV) | +Ag <sup>0</sup> | Shift* (eV) |
| O <sub>1s</sub> | O=C                                                        | 530.68 | 530.28             | 0.40        | 529.89           | 0.79        | 530.18           | 0.50        | 529.38           | 1.30        |
|                 | H-O-C                                                      | 532.58 | 531.28             | 1.30        | 530.89           | 1.69        | 532.28           | 0.30        | 531.08           | 1.50        |
| C <sub>1s</sub> | C-O-C                                                      | 286.18 | 286.28             | -0.10       | 287.08           | -0.90       | 286.38           | -0.20       | 286.22           | -0.04       |
|                 | C-C                                                        | 284.58 | 284.78             | -0.20       | 284.9            | -0.32       | 284.68           | -0.10       | 284.78           | -0.20       |
|                 | O-C=O                                                      | 287.58 | 287.88             | -0.30       | 287.98           | -0.40       | 287.68           | -0.10       | 287.78           | -0.20       |

The BE shift was assessed as the difference between the BE values before and after metal loading.

**Table S3.** XPS BE shift in CMS-based samples.

| XPS signal      | Binding energy (eV) of CMC- Based samples ( $\pm 0.05$ eV) |        |                    |             |                  |             |                  |             |                  |             |
|-----------------|------------------------------------------------------------|--------|--------------------|-------------|------------------|-------------|------------------|-------------|------------------|-------------|
|                 | Matrix                                                     | Alone  | + Cu <sup>2+</sup> | Shift* (eV) | +Cu <sup>0</sup> | Shift* (eV) | +Ag <sup>+</sup> | Shift* (eV) | +Ag <sup>0</sup> | Shift* (eV) |
| O <sub>1s</sub> | O=C                                                        | 530.78 | 530.08             | 0.70        | 529.88           | 0.90        | 530.28           | 0.50        | 529.98           | 0.80        |
|                 | H-O-C                                                      | 532.58 | 531.58             | 1.00        | 531.18           | 1.40        | 532.28           | 0.30        | 532.11           | 0.47        |
| C <sub>1s</sub> | C-O-C                                                      | 286.18 | 286.28             | -0.10       | 285.98           | 0.20        | 286.29           | -0.11       | 286.37           | -0.19       |
|                 | C-C                                                        | 284.58 | 284.78             | -0.20       | 284.48           | 0.10        | 284.78           | -0.20       | 284.68           | -0.10       |
|                 | O-C=O                                                      | 287.68 | 288.18             | -0.50       | 288.1            | -0.42       | 287.98           | -0.30       | 287.78           | -0.10       |

The BE shift was assessed as the difference between the BE values before and after metal loading.

## Procedures for IZD assessment

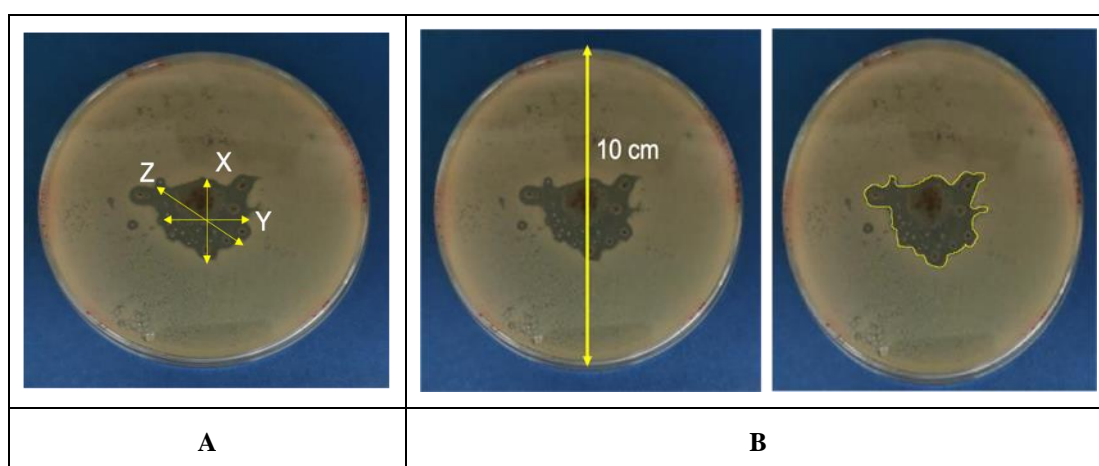

**Figure S4.** Measuring the IZD graphically (a) or by using image j software (b).

**Table S4.** Relative standard deviation on IZD measurements by two different methods.

| Samples                   | Standard deviation (%) |         |                |         |
|---------------------------|------------------------|---------|----------------|---------|
|                           | E. coli DH5 $\alpha$   |         | B. subtilis168 |         |
|                           | Graphically            | Image-j | Graphically    | Image-j |
| Ag/CMS                    | 7.5                    | 0.5     | 15.5           | 2.5     |
| Ag <sup>0</sup> /CMS      | 5.0                    | 1.0     | 9.5            | 2.3     |
| Ag/CMS/NaMt               | 6.5                    | 0.5     | 4,0            | 1.5     |
| Ag <sup>0</sup> /CMS/NaMt | 0.0                    | 0.0     | 0.0            | 0.0     |
| Cu <sup>2</sup> /CMS      | 6.0                    | 1.5     | 2.0            | 1.0     |
| Cu <sup>0</sup> /CMS      | 2.5                    | 0.5     | 1.3            | 0.5     |
| Cu <sup>2</sup> /CMS/NaMt | 5.0                    | 0.5     | 15.5           | 2.5     |
| Cu <sup>0</sup> /CMS/NaMt | 0.0                    | 0.0     | 4.5            | 0.6     |

*antibacterial tests*

| <i>E. coli</i> DH5 $\alpha$                                                         |                                                                                     | <i>B. subtilis</i> 168                                                               |                                                                                       |
|-------------------------------------------------------------------------------------|-------------------------------------------------------------------------------------|--------------------------------------------------------------------------------------|---------------------------------------------------------------------------------------|
| CMC                                                                                 | CMS                                                                                 | CMC                                                                                  | CMS                                                                                   |
|    |    |    |    |
| Ag <sup>+</sup> /CMC                                                                | Ag <sup>+</sup> /CMS                                                                | Ag <sup>+</sup> /CMC                                                                 | Ag <sup>+</sup> /CMS                                                                  |
|   |   |   |   |
| Cu <sup>2+</sup> /CMC                                                               | Cu <sup>2+</sup> /CMS                                                               | Cu <sup>2+</sup> /CMC                                                                | Cu <sup>2+</sup> /CMS                                                                 |
|  |  |  |  |

**Figure S5.** Inhibition zones in the proliferation of both bacteria strains in the presence of CMC and CMS and metal cation-loaded counterparts. The irregular IZD shape is due to the heterogenous flowability of the powders.



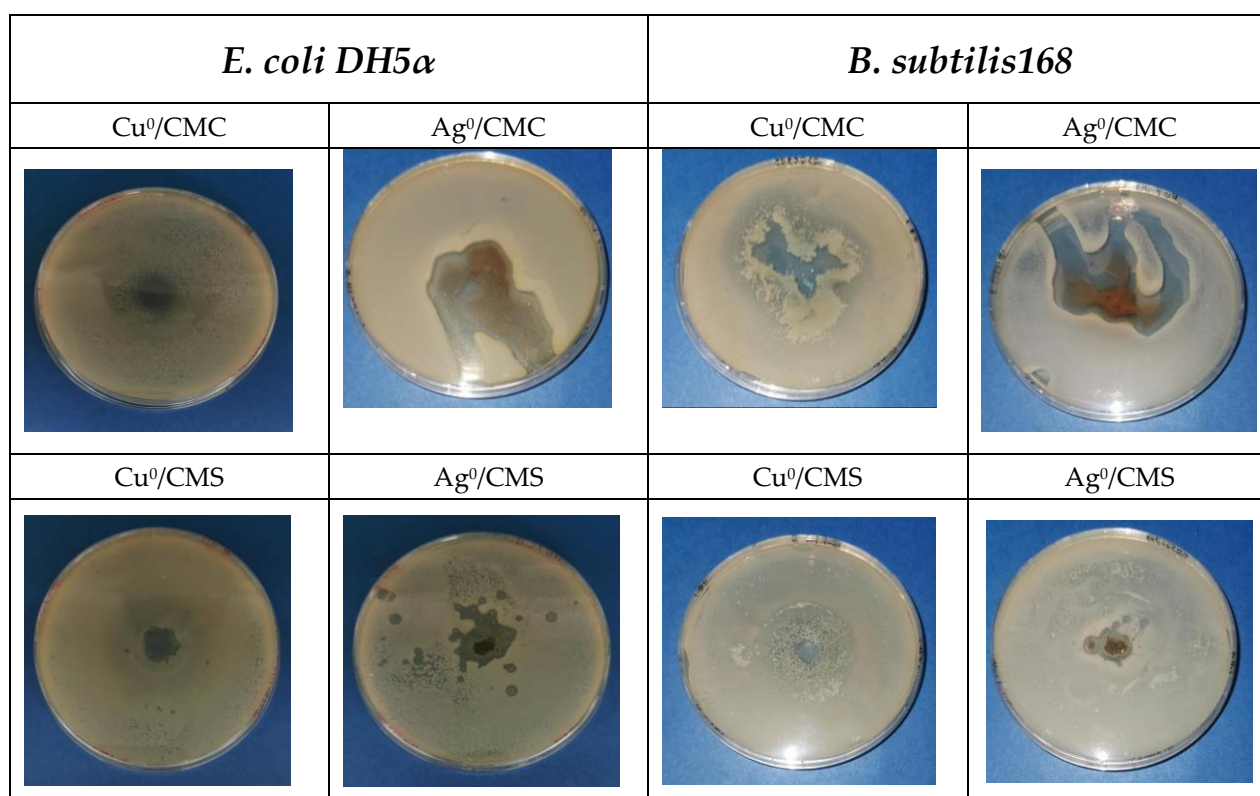

**Figure S6.** Inhibition zones in the proliferation of both bacteria strains in the presence of CMC and CMS and metal zero-loaded counterparts. The irregular IZD shape is due to the heterogenous flowability of the powders. .
